# Supplementary material for: Cross‐seasonal legacy effects of arthropod community on plant fitness in perennial plants
Source: PubMed Central journal article supplement (PMC6774310; doi:10.1111/1365-2745.13231), 2019-07-08
Supplement: JEC-107-2451-s001.pdf [file JEC-107-2451-s001.pdf]

**Supplementary Information belonging to:**

**Cross-seasonal legacy effects of arthropod community on plant fitness in perennial plants**

Jeltje M. Stam<sup>1</sup>; Martine Kos<sup>1</sup>; Marcel Dicke<sup>1</sup> and Erik H. Poelman<sup>1\*</sup>

<sup>1</sup>Laboratory of Entomology, Wageningen University, P.O. Box 16, 6700 AA Wageningen, the Netherlands

\*Corresponding author: erik.poelman@wur.nl

## **Supplementary material**

### Interpretation of ordination plots using the biplot rule

The ordination analyses of community compositions in either year resulted in PCA biplots. These graphs show on the first two ordination axes the ordination of response variables, in this case the arthropod species in the community, and explanatory variables, in this case plant seed set. Both are depicted with an arrow from the origin to their ordination on (axis 1, axis 2). PCA graphs can be interpreted using the biplot rule (Šmilauer and Lepš, 2014), in which the position of the arrow-tip representing a species is projected with right angles to the (imaginary) line extending through the arrow representing plant seed set. Species whose arrows are long and point in the same direction as the arrow representing seed set are likely to occur on plants that have a large seed set. Contrasting species with an arrow in the opposite direction of the explanatory variable are more likely to occur on plants that have a small seed set. Finally, if the response and explanatory arrow are perpendicular to each other, then they show no correlation. Furthermore, the shorter the arrow is, the lower the explained variation.

The interpretation between two or more response variables (e.g. between species) is similar; so species whose arrows are long and point in the same direction are likely to occur together on the same plant.

### From Principal Component Analysis to Structural Equation Model

The percentage of explained variation by the first PCA axis of herbivore and carnivore community in the first year and second year (Figures 3b,c and Supplementary Figures 1a,b,c) does not exactly correspond with the percentages given in SEM (Figure 1) even though exactly the same data were used. This is because in the PCA figures presented, the supplementary variable ‘Seed set 2013’ took up 1 degree of freedom to compose the PCA figures. This supplementary variable was not included in the PCAs that were used as data input for the SEM.

### Overlay plot of carnivore community ordination in 2012 and 2013

The overlay plot of the carnivore community ordination in both years as presented in the main text, Figure 3a, is the overlay of Supplementary Figure 1a (carnivores 2012) and Supplementary Figure 1b (carnivores 2013). An overlay is used instead of simply composing a PCA in which both communities are included, because an ordination is determined by all species occurring on a plant (Šmilauer and Lepš, 2014). If the ordination would have been made on both communities in a single PCA-plot, as shown in Supplementary Figure 1c, the resulting ordination is different from the ordination of carnivores 2012 (Supplementary Figure 1b) and carnivores 2013 (Supplementary Figure 1b) separately.

In Supplementary Figure 1c (carnivores 2012 \* carnivores 2013 in a single PCA), however, note the larger resemblance with the carnivore 2013-arrows of Supplementary Figure 1b (carnivores 2013), than is the case with the carnivore 2012-arrows of Supplementary Figure 1a (carnivores 2012). This is caused by the larger explained variation by PCA of the 2013-carnivore community composition compared to the 2012 carnivore community composition. (Compare % explained variation of first axis of Supplementary Figure 1a and 1b.)

### **References Supplementary material**

Šmilauer, P., & Lepš, J. (2014). *Multivariate analysis of ecological data using CANOCO 5*. Cambridge university press.

## Supplementary Table

**Supplementary Table 1.** Species encountered on the plants during both seasons, 2012 and 2013. Their functional group (herbivore / predator / parasitoid) is included; here, we grouped predators and parasitoids together as carnivores. <sup>a</sup> Species was only encountered during 2013 field season; <sup>b</sup> Only cocoons of the species were recorded; <sup>c</sup> Only mummified aphids were recorded.

| Species                                     | Order       | Family        | Functional group | Remark                 |
|---------------------------------------------|-------------|---------------|------------------|------------------------|
| <i>Phyllotreta undulata</i>                 | Coleoptera  | Chrysomelidae | Herbivore        |                        |
| <i>Phyllotreta atra</i>                     | Coleoptera  | Chrysomelidae | Herbivore        |                        |
| <i>Coccinella</i> spp.                      | Coleoptera  | Coccinellidae | Predator         |                        |
| <i>Meligethes aeneus</i>                    | Coleoptera  | Nitidulidae   | Herbivore        |                        |
| <i>Ceutorhynchus assimilis</i>              | Coleoptera  | Curculionidae | Herbivore        |                        |
| <i>Cantharis</i> spp.                       | Coleoptera  | Cantharidae   | Predator         | 2013 only <sup>a</sup> |
| <i>Amphimallon solstitiale</i>              | Coleoptera  | Scarabaeidae  | Herbivore        | 2013 only              |
| Unknown species of tortoise beetle          | Coleoptera  | Chrysomelidae | Herbivore        |                        |
| <hr/>                                       |             |               |                  |                        |
| <i>Pieris rapae</i>                         | Lepidoptera | Pieridae      | Herbivore        |                        |
| <i>Pieris brassicae</i>                     | Lepidoptera | Pieridae      | Herbivore        |                        |
| <i>Plutella xylostella</i>                  | Lepidoptera | Yponomeutidae | Herbivore        |                        |
| <i>Mamestra brassicae</i>                   | Lepidoptera | Noctuidae     | Herbivore        |                        |
| <i>Lacanobia suasa</i>                      | Lepidoptera | Noctuidae     | Herbivore        |                        |
| <i>Autographa gamma</i>                     | Lepidoptera | Noctuidae     | Herbivore        |                        |
| <i>Evergestis forficalis</i>                | Lepidoptera | Crambidae     | Herbivore        |                        |
| Several other species of <i>Lepidoptera</i> | Lepidoptera | -             | Herbivore        | 2013 only              |
| <hr/>                                       |             |               |                  |                        |
| <i>Brevicoryne brassicae</i>                | Hemiptera   | Aphididae     | Herbivore        |                        |

|                                                                                                       |              |               |            |                      |
|-------------------------------------------------------------------------------------------------------|--------------|---------------|------------|----------------------|
| <i>Myzus persicae</i>                                                                                 | Hemiptera    | Aphididae     | Herbivore  |                      |
| Other aphids than <i>B. brassicae</i> or<br><i>M. persicae</i>                                        | Hemiptera    | Aphididae     | Herbivore  |                      |
| <i>Philaenus</i> spp.                                                                                 | Hemiptera    | Aphrophoridae | Herbivore  | 2013 only            |
| <i>Orius insidiosus</i>                                                                               | Hemiptera    | Anthocoridae  | Predator   |                      |
| <i>Lygus</i> spp.                                                                                     | Hemiptera    | Miridae       | Herbivore  |                      |
| <i>Eurydema oleracea</i>                                                                              | Hemiptera    | Pentatomidae  | Herbivore  |                      |
| <i>Aleyrodes</i> spp.                                                                                 | Hemiptera    | Aleyrodidae   | Herbivore  |                      |
| -----                                                                                                 |              |               |            |                      |
| Several species of <i>Symphyla</i><br>(sawfly) larvae                                                 | Hymenoptera  | -             | Herbivore  |                      |
| <i>Cotesia rubecula</i>                                                                               | Hymenoptera  | Braconidae    | Parasitoid | Cocoons <sup>b</sup> |
| <i>Cotesia glomerata</i>                                                                              | Hymenoptera  | Braconidae    | Parasitoid | Cocoons              |
| <i>Microplitis mediator</i>                                                                           | Hymenoptera  | Braconidae    | Parasitoid | Cocoons              |
| <i>Praon</i> spp.                                                                                     | Hymenoptera  | Braconidae    | Parasitoid | Cocoons              |
| Species parasitizing <i>P. xylostella</i><br>(likely <i>Diadegma</i> spp.)                            | Hymenoptera  | Ichneumonidae | Parasitoid | Cocoons              |
| Several species parasitizing<br><i>Brevicoryne brassicae</i>                                          | Hymenoptera  | -             | Parasitoid | Mummies <sup>c</sup> |
| Several species parasitizing <i>M.</i><br><i>persicae</i>                                             | Hymenoptera  | -             | Parasitoid | Mummies <sup>c</sup> |
| Several species parasitizing other<br>aphids than <i>B. brassicae</i> or <i>M.</i><br><i>persicae</i> | Hymenoptera  | -             | Parasitoid | Mummies <sup>c</sup> |
| -----                                                                                                 |              |               |            |                      |
| Several species of Syrphidae<br>larvae                                                                | Diptera      | Syrphidae     | Predator   |                      |
| Unknown species of gall midge<br>larvae                                                               | Diptera      | Cecidomyiidae | Predator   |                      |
| Unknown species of thrips                                                                             | Thysanoptera | -             | Herbivore  |                      |
| Several species of Neuroptera                                                                         | Neuroptera   | -             | Predator   |                      |
| Several species of Spiders                                                                            | Araneae      | -             | Predator   |                      |

---

|                                                     |   |   |           |                     |
|-----------------------------------------------------|---|---|-----------|---------------------|
| Several species of snails and<br>slugs              | - | - | Herbivore | Class<br>Gastropoda |
| Several (unknown) species of leaf<br>mining insects | - | - | Herbivore | 2013 only           |

---

Supplementary Figure

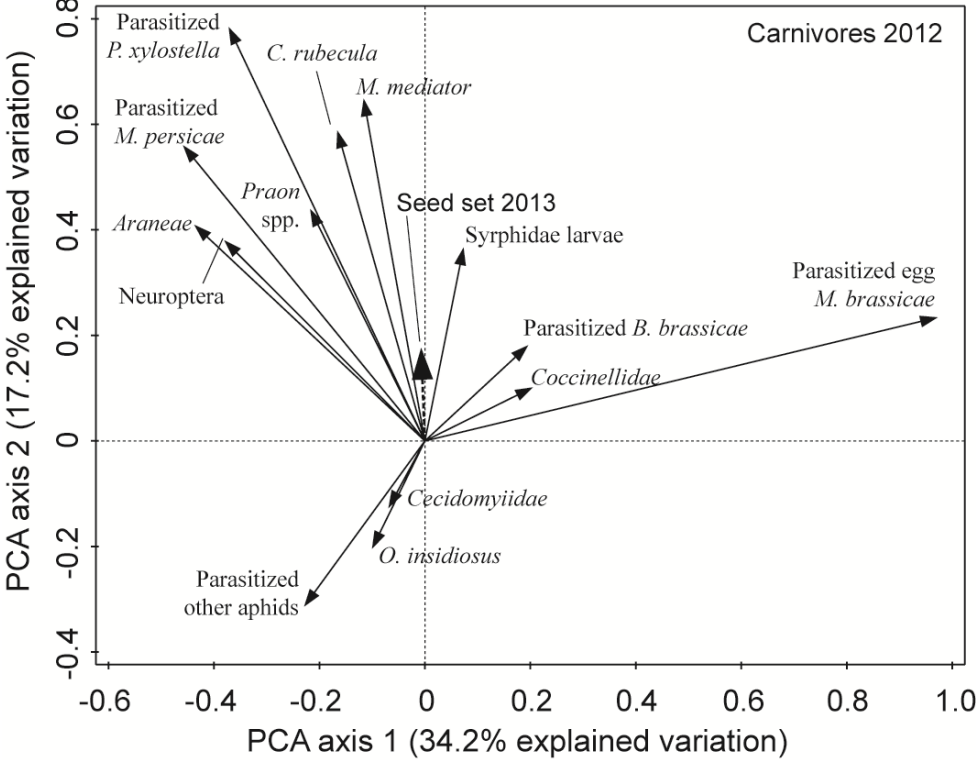

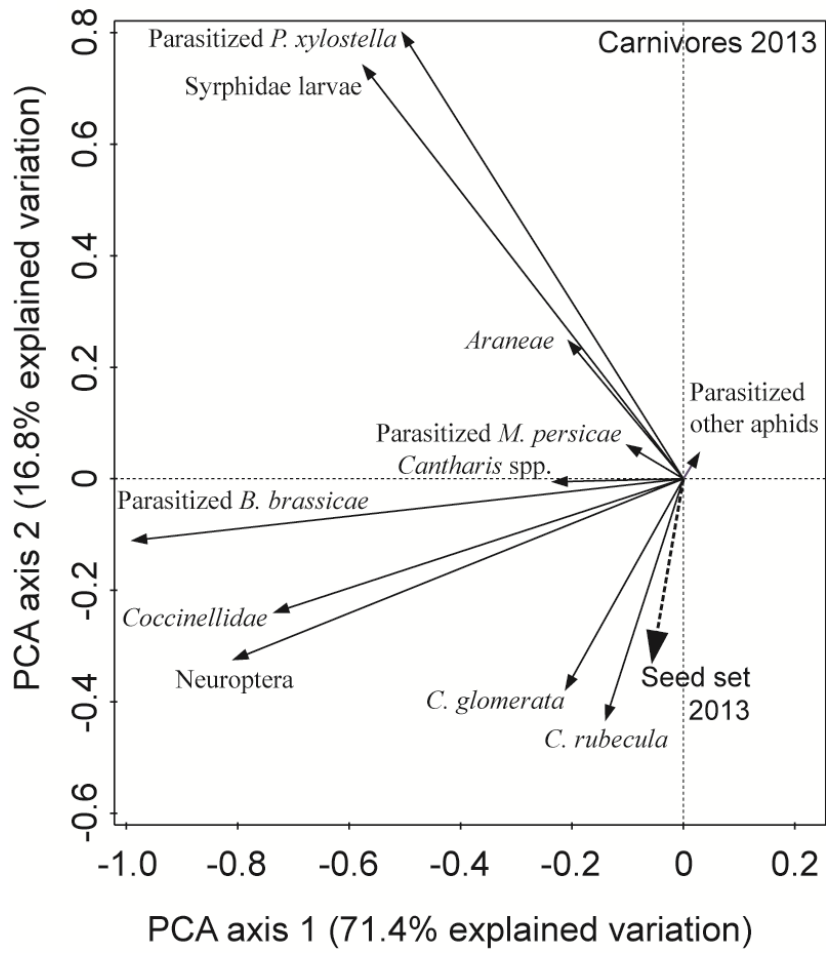



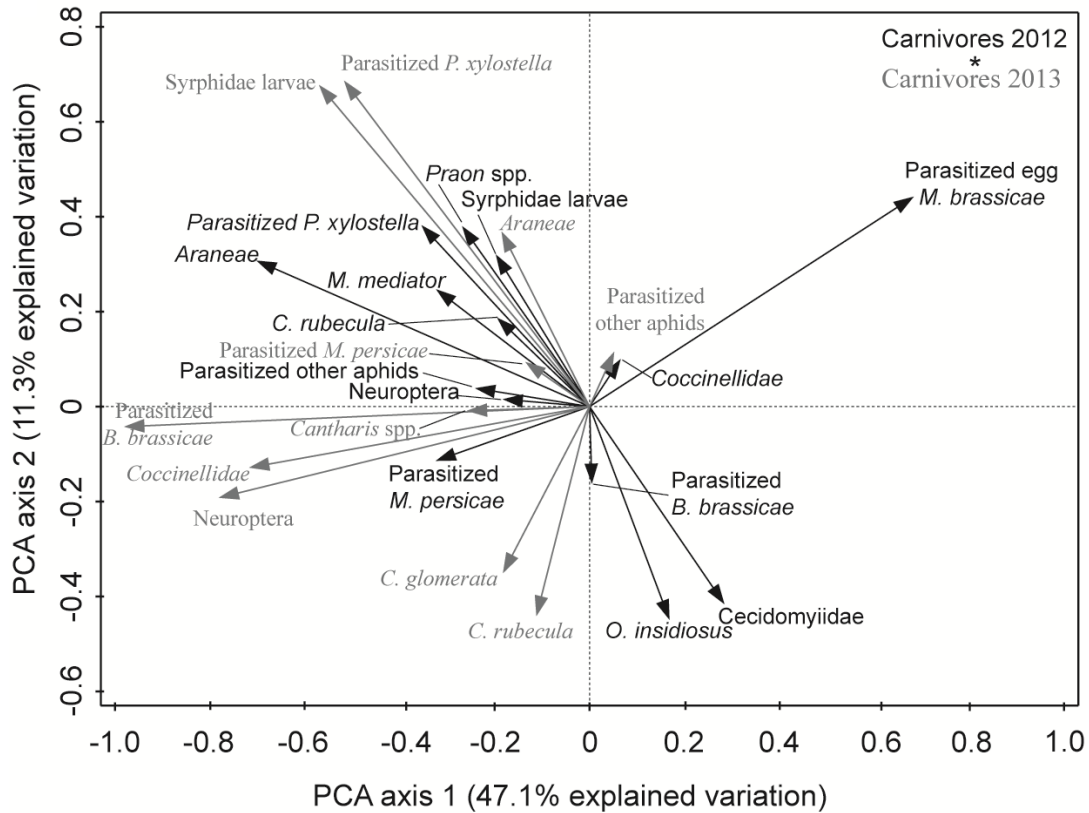

**Supplementary Figure 1.** Principal Component Analysis Ordination biplots of a) Carnivores 2012 with seed set 2013, b) Carnivores 2013 with seed set 2013 and c) Carnivores 2012 (black arrows) \* Carnivores 2013 (grey arrows). Seed set 2013 was not included in the analyses of ordination, but projected on the plots afterwards. % explained variation in community composition by seed set is for a) 3.4% and b) 2.3%.
